# Supplementary material for: Ongoing outbreak of human adenovirus-associated acute respiratory illness in the Republic of Korea military, 2013 to 2018
Source: PubMed Central journal article supplement — Korean J Intern Med. 2019 Sep 5;36(1):205–13. doi: 10.3904/kjim.2019.092 (PMC7820655; doi:10.3904/kjim.2019.092), 2019-09-05
Supplement: kjim-2019-092-suppl3.pdf [file kjim-2019-092-suppl3.pdf]

**Supplementary Table 2. Comparison of positive percentage of human adenovirus in the periods from winter to spring and from summer to fall**

| Period    | Winter to spring |      | Summer to fall |       | p value<br>(average comparison) | Peak/Nadir ratio |
|-----------|------------------|------|----------------|-------|---------------------------------|------------------|
|           | Average          | Peak | Average        | Nadir |                                 |                  |
| 2014–2015 | 58.3 ± 12.93     | 75.0 | 22.8 ± 8.48    | 15.3  | < 0.001                         | 4.90             |
| 2015–2016 | 40.5 ± 6.04      | 47.7 | 25.2 ± 5.53    | 17.1  | 0.001                           | 2.79             |
| 2016–2017 | 61.3 ± 13.06     | 73.8 | 54.4 ± 7.77    | 41.5  | 0.295                           | 1.78             |

Values are presented as mean ± standard deviation.
