# Supplementary material for: Ongoing outbreak of human adenovirus-associated acute respiratory illness in the Republic of Korea military, 2013 to 2018
Source: PubMed Central journal article supplement — Korean J Intern Med. 2019 Sep 5;36(1):205–13. doi: 10.3904/kjim.2019.092 (PMC7820655; doi:10.3904/kjim.2019.092), 2019-09-05
Supplement: kjim-2019-092-suppl4.pdf [file kjim-2019-092-suppl4.pdf]

**Supplementary Table 3. *p* values for comparison of RV detection proportions between military and civilian hospitals**

| RVs             | <i>p</i> values for comparisons of military and civilian hospitals |                        |                        |                        |                        |                        |
|-----------------|--------------------------------------------------------------------|------------------------|------------------------|------------------------|------------------------|------------------------|
|                 | January 2013–<br>May 2013                                          | June 2013–<br>May 2014 | June 2014–<br>May 2015 | June 2015–<br>May 2016 | June 2016–<br>May 2017 | June 2017–<br>May 2018 |
| HAdV            | < 0.001                                                            | < 0.001                | < 0.001                | < 0.001                | < 0.001                | < 0.001                |
| IFV             | < 0.001                                                            | < 0.001                | < 0.001                | < 0.001                | < 0.001                | < 0.001                |
| HPIV            | 0.444                                                              | < 0.001                | < 0.001                | < 0.001                | < 0.001                | < 0.001                |
| HRSV            | 0.045                                                              | 0.093                  | < 0.001                | 0.017                  | < 0.001                | < 0.001                |
| HCoV            | 0.005                                                              | 0.017                  | < 0.001                | 0.819                  | < 0.001                | 0.968                  |
| HRV             | 0.340                                                              | < 0.001                | < 0.001                | < 0.001                | < 0.001                | 0.040                  |
| HBoV            | 0.771                                                              | < 0.001                | < 0.001                | < 0.001                | < 0.001                | < 0.001                |
| HMPV            | 0.406                                                              | 0.083                  | < 0.001                | 0.206                  | < 0.001                | < 0.001                |
| Positive, total | 0.350                                                              | 0.038                  | < 0.001                | 0.392                  | < 0.001                | < 0.001                |

RV, respiratory virus; HAdV, human adenovirus; IFV, influenza virus; HPIV, human parainfluenza virus; HRSV, human respiratory syncytial virus; HCoV, human coronavirus; HRV, human rhinovirus; HBoV, human bocavirus; HMPV, human metapneumovirus.
