# Supplementary material for: Ongoing outbreak of human adenovirus-associated acute respiratory illness in the Republic of Korea military, 2013 to 2018
Source: PubMed Central journal article supplement — Korean J Intern Med. 2019 Sep 5;36(1):205–13. doi: 10.3904/kjim.2019.092 (PMC7820655; doi:10.3904/kjim.2019.092), 2019-09-05
Supplement: kjim-2019-092-suppl5.pdf [file kjim-2019-092-suppl5.pdf]

**Supplementary Table 4. Pneumonia surveillance results for 14 military hospitals and RV surveillance results for new recruits at the time of entrance**

| Variable                                                | January 2013–<br>May 2013 | June 2013–<br>May 2014 | June 2014–<br>May 2015 | June 2015–<br>May 2016 | June 2016–<br>May 2017 | June 2017–<br>May 2018 |
|---------------------------------------------------------|---------------------------|------------------------|------------------------|------------------------|------------------------|------------------------|
| Pneumonia patients                                      | 360                       | 673                    | 2,922                  | 3,474                  | 4,887                  | 3,187                  |
| HAdV detection in new recruits at entrance              | NA                        | NA                     | NA                     | 55                     | 42                     | 8                      |
| RV-PCR tests in new recruits at entrance                | NA                        | NA                     | NA                     | 2,973                  | 2,015                  | 992                    |
| HAdV positive percentage among new recruits at entrance | NA                        | NA                     | NA                     | 1.9%                   | 2.1%                   | 0.8%                   |

The number of patients with pneumonia from the 14 military hospitals was reported to the Korean Armed Forces Medical Command according to the International Classification of Disease and Related Health Problems, 10th revision, codes J12-J18. RV surveillance in new recruits was performed by the Korea Army Training Center from August 2015, for symptomatic new recruits within 1 week of entrance (before initiation of major training programs).

RV, respiratory virus; HAdV, human adenovirus; PCR, polymerase chain reaction.
