# Supplementary material for: Ongoing outbreak of human adenovirus-associated acute respiratory illness in the Republic of Korea military, 2013 to 2018
Source: PubMed Central journal article supplement — Korean J Intern Med. 2019 Sep 5;36(1):205–13. doi: 10.3904/kjim.2019.092 (PMC7820655; doi:10.3904/kjim.2019.092), 2019-09-05
Supplement: kjim-2019-092-suppl6.pdf [file kjim-2019-092-suppl6.pdf]

**Supplementary Table 5. Severe HAdV-ARIs in the Korean military**

| Variable                                | January 2013–<br>May 2013 | June 2013–<br>May 2014 | June 2014–<br>May 2015 | June 2015–<br>May 2016 | June 2016–<br>May 2017 | June 2017–<br>May 2018 | Total |
|-----------------------------------------|---------------------------|------------------------|------------------------|------------------------|------------------------|------------------------|-------|
| HAdV detection                          | 43                        | 109                    | 1,286                  | 1,037                  | 2,480                  | 1,691                  | 6,646 |
| Cidofovir treatment                     | 0                         | 5                      | 29                     | 19                     | 28                     | 25                     | 106   |
| Cidofovir treatment, %                  | 0.0                       | 4.6                    | 2.3                    | 1.8                    | 1.1                    | 1.5                    | 1.6   |
| RF requiring MV                         | 0                         | 2                      | 8                      | 5                      | 9                      | 8                      | 32    |
| RF, %                                   | 0.0                       | 1.8                    | 0.6                    | 0.5                    | 0.4                    | 0.5                    | 0.5   |
| ECMO support                            | 0                         | 0                      | 4                      | 0                      | 4                      | 7                      | 15    |
| ECMO support, %                         | 0.0                       | 0.0                    | 0.3                    | 0.0                    | 0.2                    | 0.4                    | 0.2   |
| Death                                   | 0                         | 0                      | 2                      | 0                      | 2                      | 1                      | 5     |
| Fatality rate, %                        | 0.000                     | 0.000                  | 0.156                  | 0.000                  | 0.081                  | 0.059                  | 0.075 |
| Fatality rate in patients<br>with RF, % | 0.0                       | 0.0                    | 25.0                   | 0.0                    | 22.2                   | 12.5                   | 15.6  |

HAdV, human adenovirus; ARI, acute respiratory illness; RF, respiratory failure; MV, mechanical ventilation; ECMO, extracorporeal membrane oxygenation.
